# Supplementary material
Source: publisher figshare collection journal article supplement (https://diabetesjournals.figshare.com/articles/dataset/_/22080683)
Supplement: Supplementary file 1 [file 1]

## Sheet: Supp Tables
Supplementary Table S1: Population characteristics, organized by cohort.
Supplementary Table S2: Study-specific regression modeling notes.
Supplementary Table S3: Single-variant GDI results passing a suggestive significance threshold of p < 1´10-5.
Supplementary Table S4: Gene-based aggregate rare variant testing results passing a suggestive significance threshold of p < 1´10-4.
Supplementary Table S5: Results from the UKB replication analysis in the full unrelated sample.
Supplementary Table S6: Results from the UKB replication analysis in the African-ancestry-specific sample.
Supplementary Table S7: Results from single-variant power simulations.
Supplementary Table S8: Results from rare variant set-based power simulations.

## Sheet: Table S1
Cohort	N	Sex	Age	BMI (kg / m2)	Population	Carbohydrate (%)	Fat (%)	FG (mmol/L)	FI (pmol/L)	HbA1c (%)
		(% female)
WHI	6562	1	66.7 (6.9)	28.1 (5.8)	Other: 22 (0%); American Indian: 35 (1%); Asian: 122 (2%); Hispanic/Latino: 232 (4%); African: 951 (14%); European: 5200 (79%)	50.1 (9.1)	33 (8.3)	5.7 (0.6)	54.3 (36.5)	5.2 (0.4)
HCHS SOL	6059	0.579	44.2 (13.8)	29.4 (6.2)	Hispanic/Latino: 6059 (100%)	51.7 (3.1)	30.4 (2.6)	5.2 (0.5)	72.9 (53.4)	5.5 (0.4)
ARIC	5832	0.56	53.6 (5.7)	26.7 (4.8)	African: 1102 (19%); European: 4730 (81%)	48.9 (9.3)	32.8 (6.6)	5.4 (0.5)	61.5 (44.8)	5.4 (0.4)
MESA	3621	0.516	60.8 (9.9)	27.8 (5.1)	Hispanic/Latino: 766 (24%); African: 786 (25%); European: 1609 (51%)	53.8 (8.7)	30.4 (6.8)	4.9 (0.6)	37.7 (25.5)	5.4 (0.4)
FHS	2925	0.546	48.5 (11.9)	26.9 (4.9)	Other: 2 (0%); European: 2923 (100%)	49.4 (8.9)	30.8 (6.5)	5.2 (0.5)	179.1 (89.4)	5.5 (0.3)
CHS	2693	0.592	76.6 (5.5)	26.4 (4.4)	Hispanic/Latino: 27 (1%); African: 345 (13%); European: 2314 (86%)	55.1 (8.2)	29.9 (6.5)	5.4 (0.6)	98.2 (59.8)	N/A
CARDIA	2156	0.568	45.2 (3.6)	28.7 (6.3)	African: 880 (41%); European: 1276 (59%)	47.3 (9.4)	36 (8.1)	5.2 (0.5)	66.1 (38.9)	5.3 (0.4)
JHS	1331	0.625	52.9 (12.7)	31.1 (7)	African: 1331 (100%)	48.7 (9)	36 (6.9)	5 (0.5)	94.9 (54)	5.5 (0.5)
GOLDN	807	0.533	46.5 (15.8)	27.8 (5.4)	European: 807 (100%)	49.2 (8.1)	35.4 (6.4)	5.4 (0.5)	91.5 (50.2)	N/A
GeneSTAR	426	0.634	45.8 (7.2)	29.8 (6.2)	European: 162 (38%); African: 264 (62%)	45.5 (8.5)	38.3 (7.2)	5 (0.7)	57.9 (38.3)	N/A

## Sheet: Table S2
Study	Notes
ARIC	No study-specific notes
CARDIA	No study-specific notes
CHS	Additional adjustment for study center and study center*CHO interactions; no HbA1c available
FHS	Additional adjustment for generation; no adjustment for population (single race/ethnicity)
GeneSTAR	No HbA1c available
GOLDN	No adjustment for population (single race/ethnicity); no HbA1c available
HCHS SOL	Additional adjustment for study center and study center*CHO interactions; no adjustment for population (single race/ethnicity); additional random effects for household and sampling block
JHS	No adjustment for population (single race/ethnicity)
MESA	No study-specific notes
WHI	No adjustment for sex (single sex); no random effect for kinship nor heterogeneous variances (no related individuals); no HbA1c available

## Sheet: Table S3
Trait	rsID	Chromosome	Position	Effect Allele	Avg. EAF	Main effect estimate	Interaction estimate	P-interaction
HbA1c	rs79762542	4	77979164	G	0.03	-0.013 [-0.038-0.012]	0.048 [0.031-0.064]	1.1e-08
FG	rs1288694	3	71275429	C	0.61	-0.003 [-0.011-0.004]	0.016 [0.01-0.022]	1.9e-08
lnFI	rs782681704	X	155084576	G	0.01	-0.049 [-0.209-0.11]	0.284 [0.182-0.385]	4.6e-08
HbA1c	rs550200127	8	142474223	G	0.99	0.24 [0.092-0.389]	0.268 [0.172-0.365]	5.6e-08
HbA1c	rs146242010	X	153909957	G	0.96	0.144 [0.127-0.161]	-0.028 [-0.039--0.017]	3.8e-07
HbA1c	rs142815083	7	148529092	T	0.02	-0.124 [-0.198--0.05]	-0.102 [-0.144--0.061]	1.5e-06
HbA1c	rs624	X	154521720	C	0.1	-0.135 [-0.148--0.123]	0.019 [0.011-0.028]	6.4e-06
Interaction estimates with 95% CIs are given in units of [trait units / allele / 250 kcal carbohydrate]. P-joint corresponds to a joint, 2-degree of freedom test of the genetic main and interaction effects.

## Sheet: Table S4
Trait	Gene	Variant mask	# variants	# cohorts	Chromosome	P-interaction	P-joint
FG	ENSG00000239620	MS	5	9	3	1.65e-05	0.000154
HbA1c	ENSG00000150687	MS	6	6	11	2.76e-05	0.000315
FG	ENSG00000101470	RV	2	9	20	3.93e-05	0.000175
FG	ENSG00000265097	RV	2	2	18	4.18e-05	4.43e-05
FG	ENSG00000204296	MS	7	10	6	4.83e-05	0.000184
FG	ENSG00000105655	RV	5	10	19	5.22e-05	0.000193
HbA1c	ENSG00000170476	MS	3	6	5	7.08e-05	0.000287
HbA1c	ENSG00000157884	MS	2	6	2	8.85e-05	0.000511
P-joint corresponds to a joint, 2-degree of freedom test of the genetic main and interaction effects.

## Sheet: Table S5
rsID	Effect Allele	Discovery trait	Discovery GxCHO sign	UKB trait	Interaction estimate	P-value	EAF
rs79762542	G	HbA1c	+	HbA1c	0.07	0.025	0.0015
rs79762542	G	HbA1c	+	FG	0.36	0.013	0.0055
rs1288694	C	FG	+	HbA1c	0	0.642	0.6119
rs1288694	C	FG	+	FG	-0.01	0.679	0.6123
rs782681704	G	lnFI	+	HbA1c	-0.02	0.758	0.0003
rs782681704	G	lnFI	+	FG	0.34	0.877	0.0004
Interaction estimates are given in units of [trait units / allele / 250 kcal carbohydrate]. Units are mmol/mol for HbA1c and mmol/L for FG.

## Sheet: Table S6
rsID	Effect Allele	Discovery trait	Discovery GxCHO sign	UKB trait	Interaction estimate	P-value	EAF
rs79762542	G	HbA1c	+	HbA1c	0.05	0.287	0.1116
rs79762542	G	HbA1c	+	RG	0.37	0.046	0.1047
rs1288694	C	FG	+	HbA1c	0	0.886	0.7024
rs1288694	C	FG	+	RG	-0.01	0.938	0.7136
rs782681704	G	lnFI	+	HbA1c	-0.08	0.68	0.0083
rs782681704	G	lnFI	+	RG	-3.1	0.487	0.0046
Interaction estimates are given in units of [trait units / allele / 250 kcal carbohydrate]. Units are mmol/mol for HbA1c and mmol/L for FG.

## Sheet: Table S7
Interaction effect	MAF	Reliability	N-subjects	Empirical power	Estimated interaction effect
0.025	0.01	0.25	2291200	0	0.007
0.025	0.01	0.5	1195101	0	0.014
0.025	0.01	0.75	863872	0	0.019
0.025	0.01	1	592550	0	0.026
0.0375	0.01	0.25	927841	0	0.011
0.0375	0.01	0.5	585600	0	0.02
0.0375	0.01	0.75	370818	0	0.029
0.0375	0.01	1	277399	0	0.038
0.05	0.01	0.25	572800	0	0.014
0.05	0.01	0.5	346509	0	0.026
0.05	0.01	0.75	215968	0	0.038
0.05	0.01	1	154004	0	0.051
0.0625	0.01	0.25	388473	0	0.017
0.0625	0.01	0.5	215096	0	0.033
0.0625	0.01	0.75	135355	0	0.048
0.0625	0.01	1	100923	0.04	0.063
0.075	0.01	0.25	280672	0	0.02
0.075	0.01	0.5	154004	0	0.039
0.075	0.01	0.75	95986	0.01	0.057
0.075	0.01	1	69350	0.12	0.076
0.0875	0.01	0.25	212228	0	0.023
0.0875	0.01	0.5	115674	0.01	0.045
0.0875	0.01	0.75	71593	0.06	0.066
0.0875	0.01	1	51726	0.3	0.088
0.1	0.01	0.25	166078	0	0.026
0.1	0.01	0.5	90058	0.03	0.051
0.1	0.01	0.75	53992	0.31	0.076
0.1	0.01	1	39267	0.65	0.101
0.025	0.05	0.25	616015	0	0.006
0.025	0.05	0.5	295250	0	0.013
0.025	0.05	0.75	188132	0	0.019
0.025	0.05	1	131222	0.02	0.026
0.0375	0.05	0.25	221766	0	0.01
0.0375	0.05	0.5	138220	0	0.019
0.0375	0.05	0.75	80756	0.1	0.029
0.0375	0.05	1	58321	0.25	0.039
0.05	0.05	0.25	131222	0	0.013
0.05	0.05	0.5	79836	0.14	0.025
0.05	0.05	0.75	47033	0.47	0.038
0.05	0.05	1	34105	0.83	0.051
0.0625	0.05	0.25	86627	0.04	0.016
0.0625	0.05	0.5	48728	0.47	0.032
0.0625	0.05	0.75	29477	0.92	0.048
0.0625	0.05	1	21657	1	0.064
0.075	0.05	0.25	61431	0.16	0.019
0.075	0.05	0.5	34555	0.87	0.038
0.075	0.05	0.75	20904	1	0.057
0.075	0.05	1	15358	1	0.076
0.0875	0.05	0.25	45819	0.36	0.022
0.0875	0.05	0.5	25773	1	0.044
0.0875	0.05	0.75	15591	1	0.066
0.0875	0.05	1	11199	1	0.089
0.1	0.05	0.25	35482	0.69	0.025
0.1	0.05	0.5	19184	1	0.051
0.1	0.05	0.75	11758	1	0.076
0.1	0.05	1	8696	1	0.101
0.025	0.1	0.25	346509	0	0.006
0.025	0.1	0.5	154004	0	0.012
0.025	0.1	0.75	106947	0.04	0.018
0.025	0.1	1	79836	0.18	0.025
0.0375	0.1	0.25	154004	0	0.009
0.0375	0.1	0.5	61431	0.11	0.019
0.0375	0.1	0.75	44198	0.51	0.028
0.0375	0.1	1	34555	0.86	0.038
0.05	0.1	0.25	86627	0.06	0.012
0.05	0.1	0.5	35482	0.67	0.025
0.05	0.1	0.75	25311	0.98	0.037
0.05	0.1	1	19959	1	0.05
0.0625	0.1	0.25	55441	0.32	0.015
0.0625	0.1	0.5	23077	0.99	0.031
0.0625	0.1	0.75	15686	1	0.047
0.0625	0.1	1	12572	1	0.063
0.075	0.1	0.25	34555	0.72	0.019
0.075	0.1	0.5	16199	1	0.037
0.075	0.1	0.75	11049	1	0.056
0.075	0.1	1	8871	1	0.075
0.0875	0.1	0.25	25773	0.99	0.022
0.0875	0.1	0.5	11455	1	0.044
0.0875	0.1	0.75	8201	1	0.065
0.0875	0.1	1	6443	1	0.088
0.1	0.1	0.25	19959	1	0.025
0.1	0.1	0.5	8871	1	0.05
0.1	0.1	0.75	6160	1	0.075
0.1	0.1	1	4990	1	0.1
0.025	0.5	0.25	154004	0.03	0.006
0.025	0.5	0.5	86627	0.24	0.012
0.025	0.5	0.75	34555	0.69	0.019
0.025	0.5	1	19959	0.94	0.025
0.0375	0.5	0.25	68446	0.31	0.009
0.0375	0.5	0.5	38501	0.98	0.018
0.0375	0.5	0.75	15911	1	0.028
0.0375	0.5	1	9112	1	0.037
0.05	0.5	0.25	38501	0.89	0.012
0.05	0.5	0.5	19959	1	0.025
0.05	0.5	0.75	9112	1	0.037
0.05	0.5	1	4990	1	0.05
0.0625	0.5	0.25	24641	1	0.015
0.0625	0.5	0.5	12981	1	0.031
0.0625	0.5	0.75	5647	1	0.047
0.0625	0.5	1	3245	1	0.062
0.075	0.5	0.25	17112	1	0.018
0.075	0.5	0.5	9112	1	0.037
0.075	0.5	0.75	3978	1	0.056
0.075	0.5	1	2218	1	0.075
0.0875	0.5	0.25	11455	1	0.022
0.0875	0.5	0.5	6747	1	0.043
0.0875	0.5	0.75	2952	1	0.065
0.0875	0.5	1	1648	1	0.087
0.1	0.5	0.25	8871	1	0.025
0.1	0.5	0.5	4990	1	0.05
0.1	0.5	0.75	2218	1	0.075
0.1	0.5	1	1247	1	0.1

## Sheet: Table S8
Interaction effect	MAF	Reliability	N-genetic variants	Causal fraction	N-subjects	Empirical power
0.025	0.0025	0.5	1	0.1	35000	0
0.025	0.0025	0.5	1	0.25	35000	0
0.025	0.0025	0.5	1	0.5	35000	0
0.025	0.0025	0.5	1	1	35000	0
0.025	0.0025	0.5	5	0.1	35000	0
0.025	0.0025	0.5	5	0.25	35000	0
0.025	0.0025	0.5	5	0.5	35000	0
0.025	0.0025	0.5	5	1	35000	0
0.025	0.0025	0.5	10	0.1	35000	0
0.025	0.0025	0.5	10	0.25	35000	0
0.025	0.0025	0.5	10	0.5	35000	0
0.025	0.0025	0.5	10	1	35000	0
0.025	0.0025	0.5	20	0.1	35000	0
0.025	0.0025	0.5	20	0.25	35000	0
0.025	0.0025	0.5	20	0.5	35000	0
0.025	0.0025	0.5	20	1	35000	0
0.025	0.0025	0.75	1	0.1	35000	0
0.025	0.0025	0.75	1	0.25	35000	0
0.025	0.0025	0.75	1	0.5	35000	0
0.025	0.0025	0.75	1	1	35000	0
0.025	0.0025	0.75	5	0.1	35000	0
0.025	0.0025	0.75	5	0.25	35000	0
0.025	0.0025	0.75	5	0.5	35000	0
0.025	0.0025	0.75	5	1	35000	0
0.025	0.0025	0.75	10	0.1	35000	0
0.025	0.0025	0.75	10	0.25	35000	0
0.025	0.0025	0.75	10	0.5	35000	0
0.025	0.0025	0.75	10	1	35000	0
0.025	0.0025	0.75	20	0.1	35000	0
0.025	0.0025	0.75	20	0.25	35000	0
0.025	0.0025	0.75	20	0.5	35000	0
0.025	0.0025	0.75	20	1	35000	0
0.025	0.0025	1	1	0.1	35000	0
0.025	0.0025	1	1	0.25	35000	0
0.025	0.0025	1	1	0.5	35000	0
0.025	0.0025	1	1	1	35000	0
0.025	0.0025	1	5	0.1	35000	0
0.025	0.0025	1	5	0.25	35000	0
0.025	0.0025	1	5	0.5	35000	0
0.025	0.0025	1	5	1	35000	0
0.025	0.0025	1	10	0.1	35000	0
0.025	0.0025	1	10	0.25	35000	0
0.025	0.0025	1	10	0.5	35000	0
0.025	0.0025	1	10	1	35000	0
0.025	0.0025	1	20	0.1	35000	0
0.025	0.0025	1	20	0.25	35000	0
0.025	0.0025	1	20	0.5	35000	0
0.025	0.0025	1	20	1	35000	0
0.05	0.0025	0.5	1	0.1	35000	0
0.05	0.0025	0.5	1	0.25	35000	0
0.05	0.0025	0.5	1	0.5	35000	0
0.05	0.0025	0.5	1	1	35000	0
0.05	0.0025	0.5	5	0.1	35000	0
0.05	0.0025	0.5	5	0.25	35000	0
0.05	0.0025	0.5	5	0.5	35000	0
0.05	0.0025	0.5	5	1	35000	0
0.05	0.0025	0.5	10	0.1	35000	0
0.05	0.0025	0.5	10	0.25	35000	0
0.05	0.0025	0.5	10	0.5	35000	0
0.05	0.0025	0.5	10	1	35000	0
0.05	0.0025	0.5	20	0.1	35000	0
0.05	0.0025	0.5	20	0.25	35000	0
0.05	0.0025	0.5	20	0.5	35000	0
0.05	0.0025	0.5	20	1	35000	0.03
0.05	0.0025	0.75	1	0.1	35000	0
0.05	0.0025	0.75	1	0.25	35000	0
0.05	0.0025	0.75	1	0.5	35000	0
0.05	0.0025	0.75	1	1	35000	0
0.05	0.0025	0.75	5	0.1	35000	0
0.05	0.0025	0.75	5	0.25	35000	0
0.05	0.0025	0.75	5	0.5	35000	0
0.05	0.0025	0.75	5	1	35000	0
0.05	0.0025	0.75	10	0.1	35000	0
0.05	0.0025	0.75	10	0.25	35000	0
0.05	0.0025	0.75	10	0.5	35000	0
0.05	0.0025	0.75	10	1	35000	0
0.05	0.0025	0.75	20	0.1	35000	0
0.05	0.0025	0.75	20	0.25	35000	0
0.05	0.0025	0.75	20	0.5	35000	0
0.05	0.0025	0.75	20	1	35000	0.06
0.05	0.0025	1	1	0.1	35000	0
0.05	0.0025	1	1	0.25	35000	0
0.05	0.0025	1	1	0.5	35000	0
0.05	0.0025	1	1	1	35000	0
0.05	0.0025	1	5	0.1	35000	0
0.05	0.0025	1	5	0.25	35000	0
0.05	0.0025	1	5	0.5	35000	0
0.05	0.0025	1	5	1	35000	0
0.05	0.0025	1	10	0.1	35000	0
0.05	0.0025	1	10	0.25	35000	0
0.05	0.0025	1	10	0.5	35000	0
0.05	0.0025	1	10	1	35000	0.04
0.05	0.0025	1	20	0.1	35000	0
0.05	0.0025	1	20	0.25	35000	0
0.05	0.0025	1	20	0.5	35000	0
0.05	0.0025	1	20	1	35000	0.23
0.075	0.0025	0.5	1	0.1	35000	0
0.075	0.0025	0.5	1	0.25	35000	0
0.075	0.0025	0.5	1	0.5	35000	0
0.075	0.0025	0.5	1	1	35000	0
0.075	0.0025	0.5	5	0.1	35000	0
0.075	0.0025	0.5	5	0.25	35000	0
0.075	0.0025	0.5	5	0.5	35000	0
0.075	0.0025	0.5	5	1	35000	0
0.075	0.0025	0.5	10	0.1	35000	0
0.075	0.0025	0.5	10	0.25	35000	0
0.075	0.0025	0.5	10	0.5	35000	0
0.075	0.0025	0.5	10	1	35000	0.05
0.075	0.0025	0.5	20	0.1	35000	0
0.075	0.0025	0.5	20	0.25	35000	0.01
0.075	0.0025	0.5	20	0.5	35000	0.03
0.075	0.0025	0.5	20	1	35000	0.28
0.075	0.0025	0.75	1	0.1	35000	0
0.075	0.0025	0.75	1	0.25	35000	0
0.075	0.0025	0.75	1	0.5	35000	0
0.075	0.0025	0.75	1	1	35000	0
0.075	0.0025	0.75	5	0.1	35000	0
0.075	0.0025	0.75	5	0.25	35000	0
0.075	0.0025	0.75	5	0.5	35000	0
0.075	0.0025	0.75	5	1	35000	0.03
0.075	0.0025	0.75	10	0.1	35000	0
0.075	0.0025	0.75	10	0.25	35000	0
0.075	0.0025	0.75	10	0.5	35000	0.03
0.075	0.0025	0.75	10	1	35000	0.21
0.075	0.0025	0.75	20	0.1	35000	0
0.075	0.0025	0.75	20	0.25	35000	0.02
0.075	0.0025	0.75	20	0.5	35000	0.12
0.075	0.0025	0.75	20	1	35000	0.88
0.075	0.0025	1	1	0.1	35000	0
0.075	0.0025	1	1	0.25	35000	0
0.075	0.0025	1	1	0.5	35000	0
0.075	0.0025	1	1	1	35000	0
0.075	0.0025	1	5	0.1	35000	0
0.075	0.0025	1	5	0.25	35000	0
0.075	0.0025	1	5	0.5	35000	0
0.075	0.0025	1	5	1	35000	0.08
0.075	0.0025	1	10	0.1	35000	0
0.075	0.0025	1	10	0.25	35000	0.01
0.075	0.0025	1	10	0.5	35000	0.03
0.075	0.0025	1	10	1	35000	0.58
0.075	0.0025	1	20	0.1	35000	0
0.075	0.0025	1	20	0.25	35000	0
0.075	0.0025	1	20	0.5	35000	0.32
0.075	0.0025	1	20	1	35000	0.99
0.1	0.0025	0.5	1	0.1	35000	0
0.1	0.0025	0.5	1	0.25	35000	0
0.1	0.0025	0.5	1	0.5	35000	0
0.1	0.0025	0.5	1	1	35000	0
0.1	0.0025	0.5	5	0.1	35000	0
0.1	0.0025	0.5	5	0.25	35000	0
0.1	0.0025	0.5	5	0.5	35000	0
0.1	0.0025	0.5	5	1	35000	0.04
0.1	0.0025	0.5	10	0.1	35000	0
0.1	0.0025	0.5	10	0.25	35000	0
0.1	0.0025	0.5	10	0.5	35000	0.04
0.1	0.0025	0.5	10	1	35000	0.31
0.1	0.0025	0.5	20	0.1	35000	0
0.1	0.0025	0.5	20	0.25	35000	0.02
0.1	0.0025	0.5	20	0.5	35000	0.16
0.1	0.0025	0.5	20	1	35000	0.9
0.1	0.0025	0.75	1	0.1	35000	0
0.1	0.0025	0.75	1	0.25	35000	0
0.1	0.0025	0.75	1	0.5	35000	0
0.1	0.0025	0.75	1	1	35000	0
0.1	0.0025	0.75	5	0.1	35000	0
0.1	0.0025	0.75	5	0.25	35000	0
0.1	0.0025	0.75	5	0.5	35000	0.03
0.1	0.0025	0.75	5	1	35000	0.27
0.1	0.0025	0.75	10	0.1	35000	0
0.1	0.0025	0.75	10	0.25	35000	0.02
0.1	0.0025	0.75	10	0.5	35000	0.13
0.1	0.0025	0.75	10	1	35000	0.89
0.1	0.0025	0.75	20	0.1	35000	0
0.1	0.0025	0.75	20	0.25	35000	0.08
0.1	0.0025	0.75	20	0.5	35000	0.61
0.1	0.0025	0.75	20	1	35000	1
0.1	0.0025	1	1	0.1	35000	0.01
0.1	0.0025	1	1	0.25	35000	0.01
0.1	0.0025	1	1	0.5	35000	0.01
0.1	0.0025	1	1	1	35000	0.01
0.1	0.0025	1	5	0.1	35000	0
0.1	0.0025	1	5	0.25	35000	0.01
0.1	0.0025	1	5	0.5	35000	0.1
0.1	0.0025	1	5	1	35000	0.53
0.1	0.0025	1	10	0.1	35000	0
0.1	0.0025	1	10	0.25	35000	0.03
0.1	0.0025	1	10	0.5	35000	0.34
0.1	0.0025	1	10	1	35000	1
0.1	0.0025	1	20	0.1	35000	0
0.1	0.0025	1	20	0.25	35000	0.2
0.1	0.0025	1	20	0.5	35000	0.95
0.1	0.0025	1	20	1	35000	1
0.125	0.0025	0.5	1	0.1	35000	0
0.125	0.0025	0.5	1	0.25	35000	0
0.125	0.0025	0.5	1	0.5	35000	0
0.125	0.0025	0.5	1	1	35000	0
0.125	0.0025	0.5	5	0.1	35000	0
0.125	0.0025	0.5	5	0.25	35000	0
0.125	0.0025	0.5	5	0.5	35000	0.02
0.125	0.0025	0.5	5	1	35000	0.27
0.125	0.0025	0.5	10	0.1	35000	0
0.125	0.0025	0.5	10	0.25	35000	0.01
0.125	0.0025	0.5	10	0.5	35000	0.14
0.125	0.0025	0.5	10	1	35000	0.86
0.125	0.0025	0.5	20	0.1	35000	0
0.125	0.0025	0.5	20	0.25	35000	0.08
0.125	0.0025	0.5	20	0.5	35000	0.6
0.125	0.0025	0.5	20	1	35000	1
0.125	0.0025	0.75	1	0.1	35000	0
0.125	0.0025	0.75	1	0.25	35000	0
0.125	0.0025	0.75	1	0.5	35000	0
0.125	0.0025	0.75	1	1	35000	0
0.125	0.0025	0.75	5	0.1	35000	0
0.125	0.0025	0.75	5	0.25	35000	0.03
0.125	0.0025	0.75	5	0.5	35000	0.14
0.125	0.0025	0.75	5	1	35000	0.68
0.125	0.0025	0.75	10	0.1	35000	0
0.125	0.0025	0.75	10	0.25	35000	0.09
0.125	0.0025	0.75	10	0.5	35000	0.51
0.125	0.0025	0.75	10	1	35000	1
0.125	0.0025	0.75	20	0.1	35000	0.01
0.125	0.0025	0.75	20	0.25	35000	0.25
0.125	0.0025	0.75	20	0.5	35000	0.96
0.125	0.0025	0.75	20	1	35000	1
0.125	0.0025	1	1	0.1	35000	0.04
0.125	0.0025	1	1	0.25	35000	0.04
0.125	0.0025	1	1	0.5	35000	0.04
0.125	0.0025	1	1	1	35000	0.04
0.125	0.0025	1	5	0.1	35000	0
0.125	0.0025	1	5	0.25	35000	0.08
0.125	0.0025	1	5	0.5	35000	0.38
0.125	0.0025	1	5	1	35000	0.98
0.125	0.0025	1	10	0.1	35000	0
0.125	0.0025	1	10	0.25	35000	0.23
0.125	0.0025	1	10	0.5	35000	0.88
0.125	0.0025	1	10	1	35000	1
0.125	0.0025	1	20	0.1	35000	0
0.125	0.0025	1	20	0.25	35000	0.65
0.125	0.0025	1	20	0.5	35000	1
0.125	0.0025	1	20	1	35000	1
0.15	0.0025	0.5	1	0.1	35000	0.01
0.15	0.0025	0.5	1	0.25	35000	0.01
0.15	0.0025	0.5	1	0.5	35000	0.01
0.15	0.0025	0.5	1	1	35000	0.01
0.15	0.0025	0.5	5	0.1	35000	0
0.15	0.0025	0.5	5	0.25	35000	0.03
0.15	0.0025	0.5	5	0.5	35000	0.13
0.15	0.0025	0.5	5	1	35000	0.62
0.15	0.0025	0.5	10	0.1	35000	0
0.15	0.0025	0.5	10	0.25	35000	0.06
0.15	0.0025	0.5	10	0.5	35000	0.41
0.15	0.0025	0.5	10	1	35000	1
0.15	0.0025	0.5	20	0.1	35000	0.01
0.15	0.0025	0.5	20	0.25	35000	0.22
0.15	0.0025	0.5	20	0.5	35000	0.93
0.15	0.0025	0.5	20	1	35000	1
0.15	0.0025	0.75	1	0.1	35000	0.04
0.15	0.0025	0.75	1	0.25	35000	0.04
0.15	0.0025	0.75	1	0.5	35000	0.04
0.15	0.0025	0.75	1	1	35000	0.04
0.15	0.0025	0.75	5	0.1	35000	0
0.15	0.0025	0.75	5	0.25	35000	0.09
0.15	0.0025	0.75	5	0.5	35000	0.45
0.15	0.0025	0.75	5	1	35000	0.95
0.15	0.0025	0.75	10	0.1	35000	0
0.15	0.0025	0.75	10	0.25	35000	0.27
0.15	0.0025	0.75	10	0.5	35000	0.92
0.15	0.0025	0.75	10	1	35000	1
0.15	0.0025	0.75	20	0.1	35000	0.03
0.15	0.0025	0.75	20	0.25	35000	0.63
0.15	0.0025	0.75	20	0.5	35000	1
0.15	0.0025	0.75	20	1	35000	1
0.15	0.0025	1	1	0.1	35000	0.15
0.15	0.0025	1	1	0.25	35000	0.15
0.15	0.0025	1	1	0.5	35000	0.15
0.15	0.0025	1	1	1	35000	0.15
0.15	0.0025	1	5	0.1	35000	0
0.15	0.0025	1	5	0.25	35000	0.4
0.15	0.0025	1	5	0.5	35000	0.83
0.15	0.0025	1	5	1	35000	1
0.15	0.0025	1	10	0.1	35000	0.02
0.15	0.0025	1	10	0.25	35000	0.69
0.15	0.0025	1	10	0.5	35000	1
0.15	0.0025	1	10	1	35000	1
0.15	0.0025	1	20	0.1	35000	0.05
0.15	0.0025	1	20	0.25	35000	0.96
0.15	0.0025	1	20	0.5	35000	1
0.15	0.0025	1	20	1	35000	1
0.175	0.0025	0.5	1	0.1	35000	0.02
0.175	0.0025	0.5	1	0.25	35000	0.02
0.175	0.0025	0.5	1	0.5	35000	0.02
0.175	0.0025	0.5	1	1	35000	0.02
0.175	0.0025	0.5	5	0.1	35000	0
0.175	0.0025	0.5	5	0.25	35000	0.09
0.175	0.0025	0.5	5	0.5	35000	0.32
0.175	0.0025	0.5	5	1	35000	0.86
0.175	0.0025	0.5	10	0.1	35000	0
0.175	0.0025	0.5	10	0.25	35000	0.18
0.175	0.0025	0.5	10	0.5	35000	0.79
0.175	0.0025	0.5	10	1	35000	1
0.175	0.0025	0.5	20	0.1	35000	0.05
0.175	0.0025	0.5	20	0.25	35000	0.51
0.175	0.0025	0.5	20	0.5	35000	0.99
0.175	0.0025	0.5	20	1	35000	1
0.175	0.0025	0.75	1	0.1	35000	0.19
0.175	0.0025	0.75	1	0.25	35000	0.19
0.175	0.0025	0.75	1	0.5	35000	0.19
0.175	0.0025	0.75	1	1	35000	0.19
0.175	0.0025	0.75	5	0.1	35000	0.01
0.175	0.0025	0.75	5	0.25	35000	0.34
0.175	0.0025	0.75	5	0.5	35000	0.86
0.175	0.0025	0.75	5	1	35000	1
0.175	0.0025	0.75	10	0.1	35000	0
0.175	0.0025	0.75	10	0.25	35000	0.63
0.175	0.0025	0.75	10	0.5	35000	0.99
0.175	0.0025	0.75	10	1	35000	1
0.175	0.0025	0.75	20	0.1	35000	0.11
0.175	0.0025	0.75	20	0.25	35000	0.93
0.175	0.0025	0.75	20	0.5	35000	1
0.175	0.0025	0.75	20	1	35000	1
0.175	0.0025	1	1	0.1	35000	0.33
0.175	0.0025	1	1	0.25	35000	0.33
0.175	0.0025	1	1	0.5	35000	0.33
0.175	0.0025	1	1	1	35000	0.33
0.175	0.0025	1	5	0.1	35000	0.09
0.175	0.0025	1	5	0.25	35000	0.73
0.175	0.0025	1	5	0.5	35000	1
0.175	0.0025	1	5	1	35000	1
0.175	0.0025	1	10	0.1	35000	0.04
0.175	0.0025	1	10	0.25	35000	0.98
0.175	0.0025	1	10	0.5	35000	1
0.175	0.0025	1	10	1	35000	1
0.175	0.0025	1	20	0.1	35000	0.23
0.175	0.0025	1	20	0.25	35000	1
0.175	0.0025	1	20	0.5	35000	1
0.175	0.0025	1	20	1	35000	1
0.2	0.0025	0.5	1	0.1	35000	0.08
0.2	0.0025	0.5	1	0.25	35000	0.08
0.2	0.0025	0.5	1	0.5	35000	0.08
0.2	0.0025	0.5	1	1	35000	0.08
0.2	0.0025	0.5	5	0.1	35000	0.02
0.2	0.0025	0.5	5	0.25	35000	0.26
0.2	0.0025	0.5	5	0.5	35000	0.64
0.2	0.0025	0.5	5	1	35000	0.99
0.2	0.0025	0.5	10	0.1	35000	0
0.2	0.0025	0.5	10	0.25	35000	0.42
0.2	0.0025	0.5	10	0.5	35000	0.98
0.2	0.0025	0.5	10	1	35000	1
0.2	0.0025	0.5	20	0.1	35000	0.07
0.2	0.0025	0.5	20	0.25	35000	0.8
0.2	0.0025	0.5	20	0.5	35000	1
0.2	0.0025	0.5	20	1	35000	1
0.2	0.0025	0.75	1	0.1	35000	0.33
0.2	0.0025	0.75	1	0.25	35000	0.33
0.2	0.0025	0.75	1	0.5	35000	0.33
0.2	0.0025	0.75	1	1	35000	0.33
0.2	0.0025	0.75	5	0.1	35000	0.07
0.2	0.0025	0.75	5	0.25	35000	0.69
0.2	0.0025	0.75	5	0.5	35000	0.98
0.2	0.0025	0.75	5	1	35000	1
0.2	0.0025	0.75	10	0.1	35000	0.05
0.2	0.0025	0.75	10	0.25	35000	0.92
0.2	0.0025	0.75	10	0.5	35000	1
0.2	0.0025	0.75	10	1	35000	1
0.2	0.0025	0.75	20	0.1	35000	0.18
0.2	0.0025	0.75	20	0.25	35000	0.98
0.2	0.0025	0.75	20	0.5	35000	1
0.2	0.0025	0.75	20	1	35000	1
0.2	0.0025	1	1	0.1	35000	0.56
0.2	0.0025	1	1	0.25	35000	0.56
0.2	0.0025	1	1	0.5	35000	0.56
0.2	0.0025	1	1	1	35000	0.56
0.2	0.0025	1	5	0.1	35000	0.26
0.2	0.0025	1	5	0.25	35000	0.92
0.2	0.0025	1	5	0.5	35000	1
0.2	0.0025	1	5	1	35000	1
0.2	0.0025	1	10	0.1	35000	0.08
0.2	0.0025	1	10	0.25	35000	1
0.2	0.0025	1	10	0.5	35000	1
0.2	0.0025	1	10	1	35000	1
0.2	0.0025	1	20	0.1	35000	0.6
0.2	0.0025	1	20	0.25	35000	1
0.2	0.0025	1	20	0.5	35000	1
0.2	0.0025	1	20	1	35000	1
0.025	0.005	0.5	1	0.1	35000	0
0.025	0.005	0.5	1	0.25	35000	0
0.025	0.005	0.5	1	0.5	35000	0
0.025	0.005	0.5	1	1	35000	0
0.025	0.005	0.5	5	0.1	35000	0
0.025	0.005	0.5	5	0.25	35000	0
0.025	0.005	0.5	5	0.5	35000	0
0.025	0.005	0.5	5	1	35000	0
0.025	0.005	0.5	10	0.1	35000	0
0.025	0.005	0.5	10	0.25	35000	0
0.025	0.005	0.5	10	0.5	35000	0
0.025	0.005	0.5	10	1	35000	0
0.025	0.005	0.5	20	0.1	35000	0
0.025	0.005	0.5	20	0.25	35000	0
0.025	0.005	0.5	20	0.5	35000	0
0.025	0.005	0.5	20	1	35000	0
0.025	0.005	0.75	1	0.1	35000	0
0.025	0.005	0.75	1	0.25	35000	0
0.025	0.005	0.75	1	0.5	35000	0
0.025	0.005	0.75	1	1	35000	0
0.025	0.005	0.75	5	0.1	35000	0
0.025	0.005	0.75	5	0.25	35000	0
0.025	0.005	0.75	5	0.5	35000	0
0.025	0.005	0.75	5	1	35000	0
0.025	0.005	0.75	10	0.1	35000	0
0.025	0.005	0.75	10	0.25	35000	0
0.025	0.005	0.75	10	0.5	35000	0
0.025	0.005	0.75	10	1	35000	0
0.025	0.005	0.75	20	0.1	35000	0
0.025	0.005	0.75	20	0.25	35000	0
0.025	0.005	0.75	20	0.5	35000	0
0.025	0.005	0.75	20	1	35000	0
0.025	0.005	1	1	0.1	35000	0
0.025	0.005	1	1	0.25	35000	0
0.025	0.005	1	1	0.5	35000	0
0.025	0.005	1	1	1	35000	0
0.025	0.005	1	5	0.1	35000	0
0.025	0.005	1	5	0.25	35000	0
0.025	0.005	1	5	0.5	35000	0
0.025	0.005	1	5	1	35000	0
0.025	0.005	1	10	0.1	35000	0
0.025	0.005	1	10	0.25	35000	0
0.025	0.005	1	10	0.5	35000	0
0.025	0.005	1	10	1	35000	0
0.025	0.005	1	20	0.1	35000	0
0.025	0.005	1	20	0.25	35000	0
0.025	0.005	1	20	0.5	35000	0
0.025	0.005	1	20	1	35000	0.01
0.05	0.005	0.5	1	0.1	35000	0
0.05	0.005	0.5	1	0.25	35000	0
0.05	0.005	0.5	1	0.5	35000	0
0.05	0.005	0.5	1	1	35000	0
0.05	0.005	0.5	5	0.1	35000	0
0.05	0.005	0.5	5	0.25	35000	0
0.05	0.005	0.5	5	0.5	35000	0
0.05	0.005	0.5	5	1	35000	0
0.05	0.005	0.5	10	0.1	35000	0
0.05	0.005	0.5	10	0.25	35000	0
0.05	0.005	0.5	10	0.5	35000	0
0.05	0.005	0.5	10	1	35000	0.04
0.05	0.005	0.5	20	0.1	35000	0
0.05	0.005	0.5	20	0.25	35000	0
0.05	0.005	0.5	20	0.5	35000	0.01
0.05	0.005	0.5	20	1	35000	0.24
0.05	0.005	0.75	1	0.1	35000	0
0.05	0.005	0.75	1	0.25	35000	0
0.05	0.005	0.75	1	0.5	35000	0
0.05	0.005	0.75	1	1	35000	0
0.05	0.005	0.75	5	0.1	35000	0
0.05	0.005	0.75	5	0.25	35000	0
0.05	0.005	0.75	5	0.5	35000	0
0.05	0.005	0.75	5	1	35000	0.04
0.05	0.005	0.75	10	0.1	35000	0
0.05	0.005	0.75	10	0.25	35000	0
0.05	0.005	0.75	10	0.5	35000	0
0.05	0.005	0.75	10	1	35000	0.2
0.05	0.005	0.75	20	0.1	35000	0
0.05	0.005	0.75	20	0.25	35000	0.01
0.05	0.005	0.75	20	0.5	35000	0.05
0.05	0.005	0.75	20	1	35000	0.69
0.05	0.005	1	1	0.1	35000	0
0.05	0.005	1	1	0.25	35000	0
0.05	0.005	1	1	0.5	35000	0
0.05	0.005	1	1	1	35000	0
0.05	0.005	1	5	0.1	35000	0
0.05	0.005	1	5	0.25	35000	0
0.05	0.005	1	5	0.5	35000	0
0.05	0.005	1	5	1	35000	0.05
0.05	0.005	1	10	0.1	35000	0
0.05	0.005	1	10	0.25	35000	0
0.05	0.005	1	10	0.5	35000	0.02
0.05	0.005	1	10	1	35000	0.41
0.05	0.005	1	20	0.1	35000	0
0.05	0.005	1	20	0.25	35000	0
0.05	0.005	1	20	0.5	35000	0.19
0.05	0.005	1	20	1	35000	0.96
0.075	0.005	0.5	1	0.1	35000	0
0.075	0.005	0.5	1	0.25	35000	0
0.075	0.005	0.5	1	0.5	35000	0
0.075	0.005	0.5	1	1	35000	0
0.075	0.005	0.5	5	0.1	35000	0
0.075	0.005	0.5	5	0.25	35000	0
0.075	0.005	0.5	5	0.5	35000	0
0.075	0.005	0.5	5	1	35000	0.11
0.075	0.005	0.5	10	0.1	35000	0
0.075	0.005	0.5	10	0.25	35000	0
0.075	0.005	0.5	10	0.5	35000	0.02
0.075	0.005	0.5	10	1	35000	0.5
0.075	0.005	0.5	20	0.1	35000	0
0.075	0.005	0.5	20	0.25	35000	0.01
0.075	0.005	0.5	20	0.5	35000	0.27
0.075	0.005	0.5	20	1	35000	0.98
0.075	0.005	0.75	1	0.1	35000	0
0.075	0.005	0.75	1	0.25	35000	0
0.075	0.005	0.75	1	0.5	35000	0
0.075	0.005	0.75	1	1	35000	0
0.075	0.005	0.75	5	0.1	35000	0
0.075	0.005	0.75	5	0.25	35000	0
0.075	0.005	0.75	5	0.5	35000	0.07
0.075	0.005	0.75	5	1	35000	0.38
0.075	0.005	0.75	10	0.1	35000	0
0.075	0.005	0.75	10	0.25	35000	0.01
0.075	0.005	0.75	10	0.5	35000	0.23
0.075	0.005	0.75	10	1	35000	0.95
0.075	0.005	0.75	20	0.1	35000	0
0.075	0.005	0.75	20	0.25	35000	0.06
0.075	0.005	0.75	20	0.5	35000	0.77
0.075	0.005	0.75	20	1	35000	1
0.075	0.005	1	1	0.1	35000	0.02
0.075	0.005	1	1	0.25	35000	0.02
0.075	0.005	1	1	0.5	35000	0.02
0.075	0.005	1	1	1	35000	0.02
0.075	0.005	1	5	0.1	35000	0
0.075	0.005	1	5	0.25	35000	0.02
0.075	0.005	1	5	0.5	35000	0.14
0.075	0.005	1	5	1	35000	0.72
0.075	0.005	1	10	0.1	35000	0
0.075	0.005	1	10	0.25	35000	0.08
0.075	0.005	1	10	0.5	35000	0.51
0.075	0.005	1	10	1	35000	0.99
0.075	0.005	1	20	0.1	35000	0
0.075	0.005	1	20	0.25	35000	0.33
0.075	0.005	1	20	0.5	35000	1
0.075	0.005	1	20	1	35000	1
0.1	0.005	0.5	1	0.1	35000	0
0.1	0.005	0.5	1	0.25	35000	0
0.1	0.005	0.5	1	0.5	35000	0
0.1	0.005	0.5	1	1	35000	0
0.1	0.005	0.5	5	0.1	35000	0
0.1	0.005	0.5	5	0.25	35000	0.01
0.1	0.005	0.5	5	0.5	35000	0.1
0.1	0.005	0.5	5	1	35000	0.46
0.1	0.005	0.5	10	0.1	35000	0
0.1	0.005	0.5	10	0.25	35000	0.01
0.1	0.005	0.5	10	0.5	35000	0.43
0.1	0.005	0.5	10	1	35000	0.98
0.1	0.005	0.5	20	0.1	35000	0
0.1	0.005	0.5	20	0.25	35000	0.14
0.1	0.005	0.5	20	0.5	35000	0.88
0.1	0.005	0.5	20	1	35000	1
0.1	0.005	0.75	1	0.1	35000	0.02
0.1	0.005	0.75	1	0.25	35000	0.02
0.1	0.005	0.75	1	0.5	35000	0.02
0.1	0.005	0.75	1	1	35000	0.02
0.1	0.005	0.75	5	0.1	35000	0
0.1	0.005	0.75	5	0.25	35000	0.06
0.1	0.005	0.75	5	0.5	35000	0.35
0.1	0.005	0.75	5	1	35000	0.88
0.1	0.005	0.75	10	0.1	35000	0
0.1	0.005	0.75	10	0.25	35000	0.2
0.1	0.005	0.75	10	0.5	35000	0.86
0.1	0.005	0.75	10	1	35000	1
0.1	0.005	0.75	20	0.1	35000	0
0.1	0.005	0.75	20	0.25	35000	0.61
0.1	0.005	0.75	20	0.5	35000	1
0.1	0.005	0.75	20	1	35000	1
0.1	0.005	1	1	0.1	35000	0.11
0.1	0.005	1	1	0.25	35000	0.11
0.1	0.005	1	1	0.5	35000	0.11
0.1	0.005	1	1	1	35000	0.11
0.1	0.005	1	5	0.1	35000	0
0.1	0.005	1	5	0.25	35000	0.29
0.1	0.005	1	5	0.5	35000	0.73
0.1	0.005	1	5	1	35000	1
0.1	0.005	1	10	0.1	35000	0
0.1	0.005	1	10	0.25	35000	0.54
0.1	0.005	1	10	0.5	35000	1
0.1	0.005	1	10	1	35000	1
0.1	0.005	1	20	0.1	35000	0.02
0.1	0.005	1	20	0.25	35000	0.92
0.1	0.005	1	20	0.5	35000	1
0.1	0.005	1	20	1	35000	1
0.125	0.005	0.5	1	0.1	35000	0.05
0.125	0.005	0.5	1	0.25	35000	0.05
0.125	0.005	0.5	1	0.5	35000	0.05
0.125	0.005	0.5	1	1	35000	0.05
0.125	0.005	0.5	5	0.1	35000	0
0.125	0.005	0.5	5	0.25	35000	0.08
0.125	0.005	0.5	5	0.5	35000	0.35
0.125	0.005	0.5	5	1	35000	0.89
0.125	0.005	0.5	10	0.1	35000	0
0.125	0.005	0.5	10	0.25	35000	0.23
0.125	0.005	0.5	10	0.5	35000	0.81
0.125	0.005	0.5	10	1	35000	1
0.125	0.005	0.5	20	0.1	35000	0
0.125	0.005	0.5	20	0.25	35000	0.55
0.125	0.005	0.5	20	0.5	35000	1
0.125	0.005	0.5	20	1	35000	1
0.125	0.005	0.75	1	0.1	35000	0.16
0.125	0.005	0.75	1	0.25	35000	0.16
0.125	0.005	0.75	1	0.5	35000	0.16
0.125	0.005	0.75	1	1	35000	0.16
0.125	0.005	0.75	5	0.1	35000	0.01
0.125	0.005	0.75	5	0.25	35000	0.36
0.125	0.005	0.75	5	0.5	35000	0.81
0.125	0.005	0.75	5	1	35000	1
0.125	0.005	0.75	10	0.1	35000	0
0.125	0.005	0.75	10	0.25	35000	0.77
0.125	0.005	0.75	10	0.5	35000	0.99
0.125	0.005	0.75	10	1	35000	1
0.125	0.005	0.75	20	0.1	35000	0.1
0.125	0.005	0.75	20	0.25	35000	0.97
0.125	0.005	0.75	20	0.5	35000	1
0.125	0.005	0.75	20	1	35000	1
0.125	0.005	1	1	0.1	35000	0.34
0.125	0.005	1	1	0.25	35000	0.34
0.125	0.005	1	1	0.5	35000	0.34
0.125	0.005	1	1	1	35000	0.34
0.125	0.005	1	5	0.1	35000	0.09
0.125	0.005	1	5	0.25	35000	0.82
0.125	0.005	1	5	0.5	35000	0.99
0.125	0.005	1	5	1	35000	1
0.125	0.005	1	10	0.1	35000	0.03
0.125	0.005	1	10	0.25	35000	0.95
0.125	0.005	1	10	0.5	35000	1
0.125	0.005	1	10	1	35000	1
0.125	0.005	1	20	0.1	35000	0.28
0.125	0.005	1	20	0.25	35000	1
0.125	0.005	1	20	0.5	35000	1
0.125	0.005	1	20	1	35000	1
0.15	0.005	0.5	1	0.1	35000	0.16
0.15	0.005	0.5	1	0.25	35000	0.16
0.15	0.005	0.5	1	0.5	35000	0.16
0.15	0.005	0.5	1	1	35000	0.16
0.15	0.005	0.5	5	0.1	35000	0.01
0.15	0.005	0.5	5	0.25	35000	0.31
0.15	0.005	0.5	5	0.5	35000	0.71
0.15	0.005	0.5	5	1	35000	1
0.15	0.005	0.5	10	0.1	35000	0
0.15	0.005	0.5	10	0.25	35000	0.66
0.15	0.005	0.5	10	0.5	35000	0.99
0.15	0.005	0.5	10	1	35000	1
0.15	0.005	0.5	20	0.1	35000	0.09
0.15	0.005	0.5	20	0.25	35000	0.95
0.15	0.005	0.5	20	0.5	35000	1
0.15	0.005	0.5	20	1	35000	1
0.15	0.005	0.75	1	0.1	35000	0.43
0.15	0.005	0.75	1	0.25	35000	0.43
0.15	0.005	0.75	1	0.5	35000	0.43
0.15	0.005	0.75	1	1	35000	0.43
0.15	0.005	0.75	5	0.1	35000	0.15
0.15	0.005	0.75	5	0.25	35000	0.82
0.15	0.005	0.75	5	0.5	35000	0.98
0.15	0.005	0.75	5	1	35000	1
0.15	0.005	0.75	10	0.1	35000	0.04
0.15	0.005	0.75	10	0.25	35000	0.98
0.15	0.005	0.75	10	0.5	35000	1
0.15	0.005	0.75	10	1	35000	1
0.15	0.005	0.75	20	0.1	35000	0.34
0.15	0.005	0.75	20	0.25	35000	1
0.15	0.005	0.75	20	0.5	35000	1
0.15	0.005	0.75	20	1	35000	1
0.15	0.005	1	1	0.1	35000	0.72
0.15	0.005	1	1	0.25	35000	0.72
0.15	0.005	1	1	0.5	35000	0.72
0.15	0.005	1	1	1	35000	0.72
0.15	0.005	1	5	0.1	35000	0.36
0.15	0.005	1	5	0.25	35000	0.98
0.15	0.005	1	5	0.5	35000	1
0.15	0.005	1	5	1	35000	1
0.15	0.005	1	10	0.1	35000	0.16
0.15	0.005	1	10	0.25	35000	1
0.15	0.005	1	10	0.5	35000	1
0.15	0.005	1	10	1	35000	1
0.15	0.005	1	20	0.1	35000	0.76
0.15	0.005	1	20	0.25	35000	1
0.15	0.005	1	20	0.5	35000	1
0.15	0.005	1	20	1	35000	1
0.175	0.005	0.5	1	0.1	35000	0.33
0.175	0.005	0.5	1	0.25	35000	0.33
0.175	0.005	0.5	1	0.5	35000	0.33
0.175	0.005	0.5	1	1	35000	0.33
0.175	0.005	0.5	5	0.1	35000	0.08
0.175	0.005	0.5	5	0.25	35000	0.66
0.175	0.005	0.5	5	0.5	35000	0.92
0.175	0.005	0.5	5	1	35000	1
0.175	0.005	0.5	10	0.1	35000	0.02
0.175	0.005	0.5	10	0.25	35000	0.89
0.175	0.005	0.5	10	0.5	35000	1
0.175	0.005	0.5	10	1	35000	1
0.175	0.005	0.5	20	0.1	35000	0.2
0.175	0.005	0.5	20	0.25	35000	0.99
0.175	0.005	0.5	20	0.5	35000	1
0.175	0.005	0.5	20	1	35000	1
0.175	0.005	0.75	1	0.1	35000	0.76
0.175	0.005	0.75	1	0.25	35000	0.76
0.175	0.005	0.75	1	0.5	35000	0.76
0.175	0.005	0.75	1	1	35000	0.76
0.175	0.005	0.75	5	0.1	35000	0.35
0.175	0.005	0.75	5	0.25	35000	0.98
0.175	0.005	0.75	5	0.5	35000	1
0.175	0.005	0.75	5	1	35000	1
0.175	0.005	0.75	10	0.1	35000	0.17
0.175	0.005	0.75	10	0.25	35000	1
0.175	0.005	0.75	10	0.5	35000	1
0.175	0.005	0.75	10	1	35000	1
0.175	0.005	0.75	20	0.1	35000	0.67
0.175	0.005	0.75	20	0.25	35000	1
0.175	0.005	0.75	20	0.5	35000	1
0.175	0.005	0.75	20	1	35000	1
0.175	0.005	1	1	0.1	35000	0.97
0.175	0.005	1	1	0.25	35000	0.97
0.175	0.005	1	1	0.5	35000	0.97
0.175	0.005	1	1	1	35000	0.97
0.175	0.005	1	5	0.1	35000	0.76
0.175	0.005	1	5	0.25	35000	1
0.175	0.005	1	5	0.5	35000	1
0.175	0.005	1	5	1	35000	1
0.175	0.005	1	10	0.1	35000	0.45
0.175	0.005	1	10	0.25	35000	1
0.175	0.005	1	10	0.5	35000	1
0.175	0.005	1	10	1	35000	1
0.175	0.005	1	20	0.1	35000	0.96
0.175	0.005	1	20	0.25	35000	1
0.175	0.005	1	20	0.5	35000	1
0.175	0.005	1	20	1	35000	1
0.2	0.005	0.5	1	0.1	35000	0.61
0.2	0.005	0.5	1	0.25	35000	0.61
0.2	0.005	0.5	1	0.5	35000	0.61
0.2	0.005	0.5	1	1	35000	0.61
0.2	0.005	0.5	5	0.1	35000	0.25
0.2	0.005	0.5	5	0.25	35000	0.88
0.2	0.005	0.5	5	0.5	35000	1
0.2	0.005	0.5	5	1	35000	1
0.2	0.005	0.5	10	0.1	35000	0.06
0.2	0.005	0.5	10	0.25	35000	0.99
0.2	0.005	0.5	10	0.5	35000	1
0.2	0.005	0.5	10	1	35000	1
0.2	0.005	0.5	20	0.1	35000	0.46
0.2	0.005	0.5	20	0.25	35000	1
0.2	0.005	0.5	20	0.5	35000	1
0.2	0.005	0.5	20	1	35000	1
0.2	0.005	0.75	1	0.1	35000	0.94
0.2	0.005	0.75	1	0.25	35000	0.94
0.2	0.005	0.75	1	0.5	35000	0.94
0.2	0.005	0.75	1	1	35000	0.94
0.2	0.005	0.75	5	0.1	35000	0.66
0.2	0.005	0.75	5	0.25	35000	1
0.2	0.005	0.75	5	0.5	35000	1
0.2	0.005	0.75	5	1	35000	1
0.2	0.005	0.75	10	0.1	35000	0.43
0.2	0.005	0.75	10	0.25	35000	1
0.2	0.005	0.75	10	0.5	35000	1
0.2	0.005	0.75	10	1	35000	1
0.2	0.005	0.75	20	0.1	35000	0.91
0.2	0.005	0.75	20	0.25	35000	1
0.2	0.005	0.75	20	0.5	35000	1
0.2	0.005	0.75	20	1	35000	1
0.2	0.005	1	1	0.1	35000	1
0.2	0.005	1	1	0.25	35000	1
0.2	0.005	1	1	0.5	35000	1
0.2	0.005	1	1	1	35000	1
0.2	0.005	1	5	0.1	35000	0.9
0.2	0.005	1	5	0.25	35000	1
0.2	0.005	1	5	0.5	35000	1
0.2	0.005	1	5	1	35000	1
0.2	0.005	1	10	0.1	35000	0.81
0.2	0.005	1	10	0.25	35000	1
0.2	0.005	1	10	0.5	35000	1
0.2	0.005	1	10	1	35000	1
0.2	0.005	1	20	0.1	35000	1
0.2	0.005	1	20	0.25	35000	1
0.2	0.005	1	20	0.5	35000	1
0.2	0.005	1	20	1	35000	1
0.025	0.0075	0.5	1	0.1	35000	0
0.025	0.0075	0.5	1	0.25	35000	0
0.025	0.0075	0.5	1	0.5	35000	0
0.025	0.0075	0.5	1	1	35000	0
0.025	0.0075	0.5	5	0.1	35000	0
0.025	0.0075	0.5	5	0.25	35000	0
0.025	0.0075	0.5	5	0.5	35000	0
0.025	0.0075	0.5	5	1	35000	0
0.025	0.0075	0.5	10	0.1	35000	0
0.025	0.0075	0.5	10	0.25	35000	0
0.025	0.0075	0.5	10	0.5	35000	0
0.025	0.0075	0.5	10	1	35000	0
0.025	0.0075	0.5	20	0.1	35000	0
0.025	0.0075	0.5	20	0.25	35000	0
0.025	0.0075	0.5	20	0.5	35000	0
0.025	0.0075	0.5	20	1	35000	0
0.025	0.0075	0.75	1	0.1	35000	0
0.025	0.0075	0.75	1	0.25	35000	0
0.025	0.0075	0.75	1	0.5	35000	0
0.025	0.0075	0.75	1	1	35000	0
0.025	0.0075	0.75	5	0.1	35000	0
0.025	0.0075	0.75	5	0.25	35000	0
0.025	0.0075	0.75	5	0.5	35000	0
0.025	0.0075	0.75	5	1	35000	0
0.025	0.0075	0.75	10	0.1	35000	0
0.025	0.0075	0.75	10	0.25	35000	0
0.025	0.0075	0.75	10	0.5	35000	0
0.025	0.0075	0.75	10	1	35000	0
0.025	0.0075	0.75	20	0.1	35000	0
0.025	0.0075	0.75	20	0.25	35000	0
0.025	0.0075	0.75	20	0.5	35000	0
0.025	0.0075	0.75	20	1	35000	0.02
0.025	0.0075	1	1	0.1	35000	0
0.025	0.0075	1	1	0.25	35000	0
0.025	0.0075	1	1	0.5	35000	0
0.025	0.0075	1	1	1	35000	0
0.025	0.0075	1	5	0.1	35000	0
0.025	0.0075	1	5	0.25	35000	0
0.025	0.0075	1	5	0.5	35000	0
0.025	0.0075	1	5	1	35000	0
0.025	0.0075	1	10	0.1	35000	0
0.025	0.0075	1	10	0.25	35000	0
0.025	0.0075	1	10	0.5	35000	0
0.025	0.0075	1	10	1	35000	0
0.025	0.0075	1	20	0.1	35000	0
0.025	0.0075	1	20	0.25	35000	0
0.025	0.0075	1	20	0.5	35000	0
0.025	0.0075	1	20	1	35000	0.07
0.05	0.0075	0.5	1	0.1	35000	0
0.05	0.0075	0.5	1	0.25	35000	0
0.05	0.0075	0.5	1	0.5	35000	0
0.05	0.0075	0.5	1	1	35000	0
0.05	0.0075	0.5	5	0.1	35000	0
0.05	0.0075	0.5	5	0.25	35000	0
0.05	0.0075	0.5	5	0.5	35000	0
0.05	0.0075	0.5	5	1	35000	0.03
0.05	0.0075	0.5	10	0.1	35000	0
0.05	0.0075	0.5	10	0.25	35000	0
0.05	0.0075	0.5	10	0.5	35000	0
0.05	0.0075	0.5	10	1	35000	0.14
0.05	0.0075	0.5	20	0.1	35000	0
0.05	0.0075	0.5	20	0.25	35000	0
0.05	0.0075	0.5	20	0.5	35000	0.04
0.05	0.0075	0.5	20	1	35000	0.61
0.05	0.0075	0.75	1	0.1	35000	0
0.05	0.0075	0.75	1	0.25	35000	0
0.05	0.0075	0.75	1	0.5	35000	0
0.05	0.0075	0.75	1	1	35000	0
0.05	0.0075	0.75	5	0.1	35000	0
0.05	0.0075	0.75	5	0.25	35000	0
0.05	0.0075	0.75	5	0.5	35000	0
0.05	0.0075	0.75	5	1	35000	0.09
0.05	0.0075	0.75	10	0.1	35000	0
0.05	0.0075	0.75	10	0.25	35000	0
0.05	0.0075	0.75	10	0.5	35000	0.02
0.05	0.0075	0.75	10	1	35000	0.6
0.05	0.0075	0.75	20	0.1	35000	0
0.05	0.0075	0.75	20	0.25	35000	0.01
0.05	0.0075	0.75	20	0.5	35000	0.29
0.05	0.0075	0.75	20	1	35000	0.98
0.05	0.0075	1	1	0.1	35000	0
0.05	0.0075	1	1	0.25	35000	0
0.05	0.0075	1	1	0.5	35000	0
0.05	0.0075	1	1	1	35000	0
0.05	0.0075	1	5	0.1	35000	0
0.05	0.0075	1	5	0.25	35000	0
0.05	0.0075	1	5	0.5	35000	0.03
0.05	0.0075	1	5	1	35000	0.21
0.05	0.0075	1	10	0.1	35000	0
0.05	0.0075	1	10	0.25	35000	0
0.05	0.0075	1	10	0.5	35000	0.09
0.05	0.0075	1	10	1	35000	0.94
0.05	0.0075	1	20	0.1	35000	0
0.05	0.0075	1	20	0.25	35000	0.05
0.05	0.0075	1	20	0.5	35000	0.7
0.05	0.0075	1	20	1	35000	1
0.075	0.0075	0.5	1	0.1	35000	0
0.075	0.0075	0.5	1	0.25	35000	0
0.075	0.0075	0.5	1	0.5	35000	0
0.075	0.0075	0.5	1	1	35000	0
0.075	0.0075	0.5	5	0.1	35000	0
0.075	0.0075	0.5	5	0.25	35000	0
0.075	0.0075	0.5	5	0.5	35000	0.05
0.075	0.0075	0.5	5	1	35000	0.29
0.075	0.0075	0.5	10	0.1	35000	0
0.075	0.0075	0.5	10	0.25	35000	0.02
0.075	0.0075	0.5	10	0.5	35000	0.24
0.075	0.0075	0.5	10	1	35000	0.96
0.075	0.0075	0.5	20	0.1	35000	0
0.075	0.0075	0.5	20	0.25	35000	0.04
0.075	0.0075	0.5	20	0.5	35000	0.77
0.075	0.0075	0.5	20	1	35000	1
0.075	0.0075	0.75	1	0.1	35000	0.01
0.075	0.0075	0.75	1	0.25	35000	0.01
0.075	0.0075	0.75	1	0.5	35000	0.01
0.075	0.0075	0.75	1	1	35000	0.01
0.075	0.0075	0.75	5	0.1	35000	0
0.075	0.0075	0.75	5	0.25	35000	0.03
0.075	0.0075	0.75	5	0.5	35000	0.19
0.075	0.0075	0.75	5	1	35000	0.76
0.075	0.0075	0.75	10	0.1	35000	0
0.075	0.0075	0.75	10	0.25	35000	0.09
0.075	0.0075	0.75	10	0.5	35000	0.65
0.075	0.0075	0.75	10	1	35000	1
0.075	0.0075	0.75	20	0.1	35000	0
0.075	0.0075	0.75	20	0.25	35000	0.34
0.075	0.0075	0.75	20	0.5	35000	0.99
0.075	0.0075	0.75	20	1	35000	1
0.075	0.0075	1	1	0.1	35000	0.03
0.075	0.0075	1	1	0.25	35000	0.03
0.075	0.0075	1	1	0.5	35000	0.03
0.075	0.0075	1	1	1	35000	0.03
0.075	0.0075	1	5	0.1	35000	0
0.075	0.0075	1	5	0.25	35000	0.17
0.075	0.0075	1	5	0.5	35000	0.52
0.075	0.0075	1	5	1	35000	1
0.075	0.0075	1	10	0.1	35000	0
0.075	0.0075	1	10	0.25	35000	0.38
0.075	0.0075	1	10	0.5	35000	0.97
0.075	0.0075	1	10	1	35000	1
0.075	0.0075	1	20	0.1	35000	0.02
0.075	0.0075	1	20	0.25	35000	0.77
0.075	0.0075	1	20	0.5	35000	1
0.075	0.0075	1	20	1	35000	1
0.1	0.0075	0.5	1	0.1	35000	0.02
0.1	0.0075	0.5	1	0.25	35000	0.02
0.1	0.0075	0.5	1	0.5	35000	0.02
0.1	0.0075	0.5	1	1	35000	0.02
0.1	0.0075	0.5	5	0.1	35000	0
0.1	0.0075	0.5	5	0.25	35000	0.04
0.1	0.0075	0.5	5	0.5	35000	0.26
0.1	0.0075	0.5	5	1	35000	0.85
0.1	0.0075	0.5	10	0.1	35000	0
0.1	0.0075	0.5	10	0.25	35000	0.23
0.1	0.0075	0.5	10	0.5	35000	0.8
0.1	0.0075	0.5	10	1	35000	1
0.1	0.0075	0.5	20	0.1	35000	0
0.1	0.0075	0.5	20	0.25	35000	0.5
0.1	0.0075	0.5	20	0.5	35000	1
0.1	0.0075	0.5	20	1	35000	1
0.1	0.0075	0.75	1	0.1	35000	0.09
0.1	0.0075	0.75	1	0.25	35000	0.09
0.1	0.0075	0.75	1	0.5	35000	0.09
0.1	0.0075	0.75	1	1	35000	0.09
0.1	0.0075	0.75	5	0.1	35000	0.01
0.1	0.0075	0.75	5	0.25	35000	0.3
0.1	0.0075	0.75	5	0.5	35000	0.74
0.1	0.0075	0.75	5	1	35000	1
0.1	0.0075	0.75	10	0.1	35000	0.01
0.1	0.0075	0.75	10	0.25	35000	0.71
0.1	0.0075	0.75	10	0.5	35000	0.99
0.1	0.0075	0.75	10	1	35000	1
0.1	0.0075	0.75	20	0.1	35000	0.05
0.1	0.0075	0.75	20	0.25	35000	0.95
0.1	0.0075	0.75	20	0.5	35000	1
0.1	0.0075	0.75	20	1	35000	1
0.1	0.0075	1	1	0.1	35000	0.35
0.1	0.0075	1	1	0.25	35000	0.35
0.1	0.0075	1	1	0.5	35000	0.35
0.1	0.0075	1	1	1	35000	0.35
0.1	0.0075	1	5	0.1	35000	0.06
0.1	0.0075	1	5	0.25	35000	0.79
0.1	0.0075	1	5	0.5	35000	0.99
0.1	0.0075	1	5	1	35000	1
0.1	0.0075	1	10	0.1	35000	0.01
0.1	0.0075	1	10	0.25	35000	0.97
0.1	0.0075	1	10	0.5	35000	1
0.1	0.0075	1	10	1	35000	1
0.1	0.0075	1	20	0.1	35000	0.21
0.1	0.0075	1	20	0.25	35000	1
0.1	0.0075	1	20	0.5	35000	1
0.1	0.0075	1	20	1	35000	1
0.125	0.0075	0.5	1	0.1	35000	0.12
0.125	0.0075	0.5	1	0.25	35000	0.12
0.125	0.0075	0.5	1	0.5	35000	0.12
0.125	0.0075	0.5	1	1	35000	0.12
0.125	0.0075	0.5	5	0.1	35000	0.02
0.125	0.0075	0.5	5	0.25	35000	0.3
0.125	0.0075	0.5	5	0.5	35000	0.73
0.125	0.0075	0.5	5	1	35000	1
0.125	0.0075	0.5	10	0.1	35000	0.01
0.125	0.0075	0.5	10	0.25	35000	0.65
0.125	0.0075	0.5	10	0.5	35000	0.99
0.125	0.0075	0.5	10	1	35000	1
0.125	0.0075	0.5	20	0.1	35000	0.08
0.125	0.0075	0.5	20	0.25	35000	0.94
0.125	0.0075	0.5	20	0.5	35000	1
0.125	0.0075	0.5	20	1	35000	1
0.125	0.0075	0.75	1	0.1	35000	0.43
0.125	0.0075	0.75	1	0.25	35000	0.43
0.125	0.0075	0.75	1	0.5	35000	0.43
0.125	0.0075	0.75	1	1	35000	0.43
0.125	0.0075	0.75	5	0.1	35000	0.12
0.125	0.0075	0.75	5	0.25	35000	0.81
0.125	0.0075	0.75	5	0.5	35000	1
0.125	0.0075	0.75	5	1	35000	1
0.125	0.0075	0.75	10	0.1	35000	0.05
0.125	0.0075	0.75	10	0.25	35000	1
0.125	0.0075	0.75	10	0.5	35000	1
0.125	0.0075	0.75	10	1	35000	1
0.125	0.0075	0.75	20	0.1	35000	0.36
0.125	0.0075	0.75	20	0.25	35000	1
0.125	0.0075	0.75	20	0.5	35000	1
0.125	0.0075	0.75	20	1	35000	1
0.125	0.0075	1	1	0.1	35000	0.84
0.125	0.0075	1	1	0.25	35000	0.84
0.125	0.0075	1	1	0.5	35000	0.84
0.125	0.0075	1	1	1	35000	0.84
0.125	0.0075	1	5	0.1	35000	0.4
0.125	0.0075	1	5	0.25	35000	0.99
0.125	0.0075	1	5	0.5	35000	1
0.125	0.0075	1	5	1	35000	1
0.125	0.0075	1	10	0.1	35000	0.19
0.125	0.0075	1	10	0.25	35000	1
0.125	0.0075	1	10	0.5	35000	1
0.125	0.0075	1	10	1	35000	1
0.125	0.0075	1	20	0.1	35000	0.77
0.125	0.0075	1	20	0.25	35000	1
0.125	0.0075	1	20	0.5	35000	1
0.125	0.0075	1	20	1	35000	1
0.15	0.0075	0.5	1	0.1	35000	0.38
0.15	0.0075	0.5	1	0.25	35000	0.38
0.15	0.0075	0.5	1	0.5	35000	0.38
0.15	0.0075	0.5	1	1	35000	0.38
0.15	0.0075	0.5	5	0.1	35000	0.12
0.15	0.0075	0.5	5	0.25	35000	0.68
0.15	0.0075	0.5	5	0.5	35000	0.96
0.15	0.0075	0.5	5	1	35000	1
0.15	0.0075	0.5	10	0.1	35000	0.04
0.15	0.0075	0.5	10	0.25	35000	0.94
0.15	0.0075	0.5	10	0.5	35000	0.99
0.15	0.0075	0.5	10	1	35000	1
0.15	0.0075	0.5	20	0.1	35000	0.27
0.15	0.0075	0.5	20	0.25	35000	1
0.15	0.0075	0.5	20	0.5	35000	1
0.15	0.0075	0.5	20	1	35000	1
0.15	0.0075	0.75	1	0.1	35000	0.85
0.15	0.0075	0.75	1	0.25	35000	0.85
0.15	0.0075	0.75	1	0.5	35000	0.85
0.15	0.0075	0.75	1	1	35000	0.85
0.15	0.0075	0.75	5	0.1	35000	0.41
0.15	0.0075	0.75	5	0.25	35000	0.99
0.15	0.0075	0.75	5	0.5	35000	1
0.15	0.0075	0.75	5	1	35000	1
0.15	0.0075	0.75	10	0.1	35000	0.25
0.15	0.0075	0.75	10	0.25	35000	1
0.15	0.0075	0.75	10	0.5	35000	1
0.15	0.0075	0.75	10	1	35000	1
0.15	0.0075	0.75	20	0.1	35000	0.75
0.15	0.0075	0.75	20	0.25	35000	1
0.15	0.0075	0.75	20	0.5	35000	1
0.15	0.0075	0.75	20	1	35000	1
0.15	0.0075	1	1	0.1	35000	1
0.15	0.0075	1	1	0.25	35000	1
0.15	0.0075	1	1	0.5	35000	1
0.15	0.0075	1	1	1	35000	1
0.15	0.0075	1	5	0.1	35000	0.83
0.15	0.0075	1	5	0.25	35000	1
0.15	0.0075	1	5	0.5	35000	1
0.15	0.0075	1	5	1	35000	1
0.15	0.0075	1	10	0.1	35000	0.6
0.15	0.0075	1	10	0.25	35000	1
0.15	0.0075	1	10	0.5	35000	1
0.15	0.0075	1	10	1	35000	1
0.15	0.0075	1	20	0.1	35000	0.97
0.15	0.0075	1	20	0.25	35000	1
0.15	0.0075	1	20	0.5	35000	1
0.15	0.0075	1	20	1	35000	1
0.175	0.0075	0.5	1	0.1	35000	0.67
0.175	0.0075	0.5	1	0.25	35000	0.67
0.175	0.0075	0.5	1	0.5	35000	0.67
0.175	0.0075	0.5	1	1	35000	0.67
0.175	0.0075	0.5	5	0.1	35000	0.34
0.175	0.0075	0.5	5	0.25	35000	0.97
0.175	0.0075	0.5	5	0.5	35000	1
0.175	0.0075	0.5	5	1	35000	1
0.175	0.0075	0.5	10	0.1	35000	0.13
0.175	0.0075	0.5	10	0.25	35000	1
0.175	0.0075	0.5	10	0.5	35000	1
0.175	0.0075	0.5	10	1	35000	1
0.175	0.0075	0.5	20	0.1	35000	0.63
0.175	0.0075	0.5	20	0.25	35000	1
0.175	0.0075	0.5	20	0.5	35000	1
0.175	0.0075	0.5	20	1	35000	1
0.175	0.0075	0.75	1	0.1	35000	0.98
0.175	0.0075	0.75	1	0.25	35000	0.98
0.175	0.0075	0.75	1	0.5	35000	0.98
0.175	0.0075	0.75	1	1	35000	0.98
0.175	0.0075	0.75	5	0.1	35000	0.8
0.175	0.0075	0.75	5	0.25	35000	1
0.175	0.0075	0.75	5	0.5	35000	1
0.175	0.0075	0.75	5	1	35000	1
0.175	0.0075	0.75	10	0.1	35000	0.59
0.175	0.0075	0.75	10	0.25	35000	1
0.175	0.0075	0.75	10	0.5	35000	1
0.175	0.0075	0.75	10	1	35000	1
0.175	0.0075	0.75	20	0.1	35000	0.96
0.175	0.0075	0.75	20	0.25	35000	1
0.175	0.0075	0.75	20	0.5	35000	1
0.175	0.0075	0.75	20	1	35000	1
0.175	0.0075	1	1	0.1	35000	1
0.175	0.0075	1	1	0.25	35000	1
0.175	0.0075	1	1	0.5	35000	1
0.175	0.0075	1	1	1	35000	1
0.175	0.0075	1	5	0.1	35000	0.98
0.175	0.0075	1	5	0.25	35000	1
0.175	0.0075	1	5	0.5	35000	1
0.175	0.0075	1	5	1	35000	1
0.175	0.0075	1	10	0.1	35000	0.91
0.175	0.0075	1	10	0.25	35000	1
0.175	0.0075	1	10	0.5	35000	1
0.175	0.0075	1	10	1	35000	1
0.175	0.0075	1	20	0.1	35000	1
0.175	0.0075	1	20	0.25	35000	1
0.175	0.0075	1	20	0.5	35000	1
0.175	0.0075	1	20	1	35000	1
0.2	0.0075	0.5	1	0.1	35000	0.91
0.2	0.0075	0.5	1	0.25	35000	0.91
0.2	0.0075	0.5	1	0.5	35000	0.91
0.2	0.0075	0.5	1	1	35000	0.91
0.2	0.0075	0.5	5	0.1	35000	0.56
0.2	0.0075	0.5	5	0.25	35000	1
0.2	0.0075	0.5	5	0.5	35000	1
0.2	0.0075	0.5	5	1	35000	1
0.2	0.0075	0.5	10	0.1	35000	0.33
0.2	0.0075	0.5	10	0.25	35000	1
0.2	0.0075	0.5	10	0.5	35000	1
0.2	0.0075	0.5	10	1	35000	1
0.2	0.0075	0.5	20	0.1	35000	0.86
0.2	0.0075	0.5	20	0.25	35000	1
0.2	0.0075	0.5	20	0.5	35000	1
0.2	0.0075	0.5	20	1	35000	1
0.2	0.0075	0.75	1	0.1	35000	0.99
0.2	0.0075	0.75	1	0.25	35000	0.99
0.2	0.0075	0.75	1	0.5	35000	0.99
0.2	0.0075	0.75	1	1	35000	0.99
0.2	0.0075	0.75	5	0.1	35000	0.93
0.2	0.0075	0.75	5	0.25	35000	1
0.2	0.0075	0.75	5	0.5	35000	1
0.2	0.0075	0.75	5	1	35000	1
0.2	0.0075	0.75	10	0.1	35000	0.85
0.2	0.0075	0.75	10	0.25	35000	1
0.2	0.0075	0.75	10	0.5	35000	1
0.2	0.0075	0.75	10	1	35000	1
0.2	0.0075	0.75	20	0.1	35000	1
0.2	0.0075	0.75	20	0.25	35000	1
0.2	0.0075	0.75	20	0.5	35000	1
0.2	0.0075	0.75	20	1	35000	1
0.2	0.0075	1	1	0.1	35000	1
0.2	0.0075	1	1	0.25	35000	1
0.2	0.0075	1	1	0.5	35000	1
0.2	0.0075	1	1	1	35000	1
0.2	0.0075	1	5	0.1	35000	1
0.2	0.0075	1	5	0.25	35000	1
0.2	0.0075	1	5	0.5	35000	1
0.2	0.0075	1	5	1	35000	1
0.2	0.0075	1	10	0.1	35000	0.99
0.2	0.0075	1	10	0.25	35000	1
0.2	0.0075	1	10	0.5	35000	1
0.2	0.0075	1	10	1	35000	1
0.2	0.0075	1	20	0.1	35000	1
0.2	0.0075	1	20	0.25	35000	1
0.2	0.0075	1	20	0.5	35000	1
0.2	0.0075	1	20	1	35000	1
0.025	0.01	0.5	1	0.1	35000	0
0.025	0.01	0.5	1	0.25	35000	0
0.025	0.01	0.5	1	0.5	35000	0
0.025	0.01	0.5	1	1	35000	0
0.025	0.01	0.5	5	0.1	35000	0
0.025	0.01	0.5	5	0.25	35000	0
0.025	0.01	0.5	5	0.5	35000	0
0.025	0.01	0.5	5	1	35000	0
0.025	0.01	0.5	10	0.1	35000	0
0.025	0.01	0.5	10	0.25	35000	0
0.025	0.01	0.5	10	0.5	35000	0
0.025	0.01	0.5	10	1	35000	0
0.025	0.01	0.5	20	0.1	35000	0
0.025	0.01	0.5	20	0.25	35000	0
0.025	0.01	0.5	20	0.5	35000	0
0.025	0.01	0.5	20	1	35000	0.01
0.025	0.01	0.75	1	0.1	35000	0
0.025	0.01	0.75	1	0.25	35000	0
0.025	0.01	0.75	1	0.5	35000	0
0.025	0.01	0.75	1	1	35000	0
0.025	0.01	0.75	5	0.1	35000	0
0.025	0.01	0.75	5	0.25	35000	0
0.025	0.01	0.75	5	0.5	35000	0
0.025	0.01	0.75	5	1	35000	0
0.025	0.01	0.75	10	0.1	35000	0
0.025	0.01	0.75	10	0.25	35000	0
0.025	0.01	0.75	10	0.5	35000	0
0.025	0.01	0.75	10	1	35000	0
0.025	0.01	0.75	20	0.1	35000	0
0.025	0.01	0.75	20	0.25	35000	0
0.025	0.01	0.75	20	0.5	35000	0.01
0.025	0.01	0.75	20	1	35000	0.1
0.025	0.01	1	1	0.1	35000	0
0.025	0.01	1	1	0.25	35000	0
0.025	0.01	1	1	0.5	35000	0
0.025	0.01	1	1	1	35000	0
0.025	0.01	1	5	0.1	35000	0
0.025	0.01	1	5	0.25	35000	0
0.025	0.01	1	5	0.5	35000	0
0.025	0.01	1	5	1	35000	0
0.025	0.01	1	10	0.1	35000	0
0.025	0.01	1	10	0.25	35000	0
0.025	0.01	1	10	0.5	35000	0
0.025	0.01	1	10	1	35000	0.03
0.025	0.01	1	20	0.1	35000	0
0.025	0.01	1	20	0.25	35000	0
0.025	0.01	1	20	0.5	35000	0.01
0.025	0.01	1	20	1	35000	0.14
0.05	0.01	0.5	1	0.1	35000	0
0.05	0.01	0.5	1	0.25	35000	0
0.05	0.01	0.5	1	0.5	35000	0
0.05	0.01	0.5	1	1	35000	0
0.05	0.01	0.5	5	0.1	35000	0
0.05	0.01	0.5	5	0.25	35000	0
0.05	0.01	0.5	5	0.5	35000	0
0.05	0.01	0.5	5	1	35000	0.05
0.05	0.01	0.5	10	0.1	35000	0
0.05	0.01	0.5	10	0.25	35000	0
0.05	0.01	0.5	10	0.5	35000	0
0.05	0.01	0.5	10	1	35000	0.37
0.05	0.01	0.5	20	0.1	35000	0
0.05	0.01	0.5	20	0.25	35000	0
0.05	0.01	0.5	20	0.5	35000	0.19
0.05	0.01	0.5	20	1	35000	0.91
0.05	0.01	0.75	1	0.1	35000	0
0.05	0.01	0.75	1	0.25	35000	0
0.05	0.01	0.75	1	0.5	35000	0
0.05	0.01	0.75	1	1	35000	0
0.05	0.01	0.75	5	0.1	35000	0
0.05	0.01	0.75	5	0.25	35000	0
0.05	0.01	0.75	5	0.5	35000	0.02
0.05	0.01	0.75	5	1	35000	0.27
0.05	0.01	0.75	10	0.1	35000	0
0.05	0.01	0.75	10	0.25	35000	0.01
0.05	0.01	0.75	10	0.5	35000	0.13
0.05	0.01	0.75	10	1	35000	0.92
0.05	0.01	0.75	20	0.1	35000	0
0.05	0.01	0.75	20	0.25	35000	0.05
0.05	0.01	0.75	20	0.5	35000	0.65
0.05	0.01	0.75	20	1	35000	1
0.05	0.01	1	1	0.1	35000	0
0.05	0.01	1	1	0.25	35000	0
0.05	0.01	1	1	0.5	35000	0
0.05	0.01	1	1	1	35000	0
0.05	0.01	1	5	0.1	35000	0
0.05	0.01	1	5	0.25	35000	0.03
0.05	0.01	1	5	0.5	35000	0.12
0.05	0.01	1	5	1	35000	0.59
0.05	0.01	1	10	0.1	35000	0
0.05	0.01	1	10	0.25	35000	0.02
0.05	0.01	1	10	0.5	35000	0.33
0.05	0.01	1	10	1	35000	1
0.05	0.01	1	20	0.1	35000	0
0.05	0.01	1	20	0.25	35000	0.12
0.05	0.01	1	20	0.5	35000	0.96
0.05	0.01	1	20	1	35000	1
0.075	0.01	0.5	1	0.1	35000	0
0.075	0.01	0.5	1	0.25	35000	0
0.075	0.01	0.5	1	0.5	35000	0
0.075	0.01	0.5	1	1	35000	0
0.075	0.01	0.5	5	0.1	35000	0
0.075	0.01	0.5	5	0.25	35000	0.01
0.075	0.01	0.5	5	0.5	35000	0.07
0.075	0.01	0.5	5	1	35000	0.6
0.075	0.01	0.5	10	0.1	35000	0
0.075	0.01	0.5	10	0.25	35000	0.06
0.075	0.01	0.5	10	0.5	35000	0.44
0.075	0.01	0.5	10	1	35000	0.99
0.075	0.01	0.5	20	0.1	35000	0
0.075	0.01	0.5	20	0.25	35000	0.27
0.075	0.01	0.5	20	0.5	35000	0.91
0.075	0.01	0.5	20	1	35000	1
0.075	0.01	0.75	1	0.1	35000	0.01
0.075	0.01	0.75	1	0.25	35000	0.01
0.075	0.01	0.75	1	0.5	35000	0.01
0.075	0.01	0.75	1	1	35000	0.01
0.075	0.01	0.75	5	0.1	35000	0
0.075	0.01	0.75	5	0.25	35000	0.09
0.075	0.01	0.75	5	0.5	35000	0.46
0.075	0.01	0.75	5	1	35000	0.97
0.075	0.01	0.75	10	0.1	35000	0
0.075	0.01	0.75	10	0.25	35000	0.34
0.075	0.01	0.75	10	0.5	35000	0.94
0.075	0.01	0.75	10	1	35000	1
0.075	0.01	0.75	20	0.1	35000	0.01
0.075	0.01	0.75	20	0.25	35000	0.71
0.075	0.01	0.75	20	0.5	35000	1
0.075	0.01	0.75	20	1	35000	1
0.075	0.01	1	1	0.1	35000	0.12
0.075	0.01	1	1	0.25	35000	0.12
0.075	0.01	1	1	0.5	35000	0.12
0.075	0.01	1	1	1	35000	0.12
0.075	0.01	1	5	0.1	35000	0
0.075	0.01	1	5	0.25	35000	0.42
0.075	0.01	1	5	0.5	35000	0.87
0.075	0.01	1	5	1	35000	1
0.075	0.01	1	10	0.1	35000	0.01
0.075	0.01	1	10	0.25	35000	0.68
0.075	0.01	1	10	0.5	35000	1
0.075	0.01	1	10	1	35000	1
0.075	0.01	1	20	0.1	35000	0.05
0.075	0.01	1	20	0.25	35000	0.93
0.075	0.01	1	20	0.5	35000	1
0.075	0.01	1	20	1	35000	1
0.1	0.01	0.5	1	0.1	35000	0.03
0.1	0.01	0.5	1	0.25	35000	0.03
0.1	0.01	0.5	1	0.5	35000	0.03
0.1	0.01	0.5	1	1	35000	0.03
0.1	0.01	0.5	5	0.1	35000	0
0.1	0.01	0.5	5	0.25	35000	0.18
0.1	0.01	0.5	5	0.5	35000	0.59
0.1	0.01	0.5	5	1	35000	0.98
0.1	0.01	0.5	10	0.1	35000	0.01
0.1	0.01	0.5	10	0.25	35000	0.47
0.1	0.01	0.5	10	0.5	35000	0.97
0.1	0.01	0.5	10	1	35000	1
0.1	0.01	0.5	20	0.1	35000	0.06
0.1	0.01	0.5	20	0.25	35000	0.83
0.1	0.01	0.5	20	0.5	35000	1
0.1	0.01	0.5	20	1	35000	1
0.1	0.01	0.75	1	0.1	35000	0.31
0.1	0.01	0.75	1	0.25	35000	0.31
0.1	0.01	0.75	1	0.5	35000	0.31
0.1	0.01	0.75	1	1	35000	0.31
0.1	0.01	0.75	5	0.1	35000	0.06
0.1	0.01	0.75	5	0.25	35000	0.62
0.1	0.01	0.75	5	0.5	35000	0.94
0.1	0.01	0.75	5	1	35000	1
0.1	0.01	0.75	10	0.1	35000	0.02
0.1	0.01	0.75	10	0.25	35000	0.96
0.1	0.01	0.75	10	0.5	35000	1
0.1	0.01	0.75	10	1	35000	1
0.1	0.01	0.75	20	0.1	35000	0.3
0.1	0.01	0.75	20	0.25	35000	1
0.1	0.01	0.75	20	0.5	35000	1
0.1	0.01	0.75	20	1	35000	1
0.1	0.01	1	1	0.1	35000	0.65
0.1	0.01	1	1	0.25	35000	0.65
0.1	0.01	1	1	0.5	35000	0.65
0.1	0.01	1	1	1	35000	0.65
0.1	0.01	1	5	0.1	35000	0.25
0.1	0.01	1	5	0.25	35000	0.95
0.1	0.01	1	5	0.5	35000	0.99
0.1	0.01	1	5	1	35000	1
0.1	0.01	1	10	0.1	35000	0.06
0.1	0.01	1	10	0.25	35000	1
0.1	0.01	1	10	0.5	35000	1
0.1	0.01	1	10	1	35000	1
0.1	0.01	1	20	0.1	35000	0.64
0.1	0.01	1	20	0.25	35000	1
0.1	0.01	1	20	0.5	35000	1
0.1	0.01	1	20	1	35000	1
0.125	0.01	0.5	1	0.1	35000	0.32
0.125	0.01	0.5	1	0.25	35000	0.32
0.125	0.01	0.5	1	0.5	35000	0.32
0.125	0.01	0.5	1	1	35000	0.32
0.125	0.01	0.5	5	0.1	35000	0.1
0.125	0.01	0.5	5	0.25	35000	0.65
0.125	0.01	0.5	5	0.5	35000	0.94
0.125	0.01	0.5	5	1	35000	1
0.125	0.01	0.5	10	0.1	35000	0.02
0.125	0.01	0.5	10	0.25	35000	0.93
0.125	0.01	0.5	10	0.5	35000	1
0.125	0.01	0.5	10	1	35000	1
0.125	0.01	0.5	20	0.1	35000	0.25
0.125	0.01	0.5	20	0.25	35000	0.99
0.125	0.01	0.5	20	0.5	35000	1
0.125	0.01	0.5	20	1	35000	1
0.125	0.01	0.75	1	0.1	35000	0.78
0.125	0.01	0.75	1	0.25	35000	0.78
0.125	0.01	0.75	1	0.5	35000	0.78
0.125	0.01	0.75	1	1	35000	0.78
0.125	0.01	0.75	5	0.1	35000	0.36
0.125	0.01	0.75	5	0.25	35000	0.97
0.125	0.01	0.75	5	0.5	35000	1
0.125	0.01	0.75	5	1	35000	1
0.125	0.01	0.75	10	0.1	35000	0.17
0.125	0.01	0.75	10	0.25	35000	1
0.125	0.01	0.75	10	0.5	35000	1
0.125	0.01	0.75	10	1	35000	1
0.125	0.01	0.75	20	0.1	35000	0.66
0.125	0.01	0.75	20	0.25	35000	1
0.125	0.01	0.75	20	0.5	35000	1
0.125	0.01	0.75	20	1	35000	1
0.125	0.01	1	1	0.1	35000	0.97
0.125	0.01	1	1	0.25	35000	0.97
0.125	0.01	1	1	0.5	35000	0.97
0.125	0.01	1	1	1	35000	0.97
0.125	0.01	1	5	0.1	35000	0.72
0.125	0.01	1	5	0.25	35000	0.99
0.125	0.01	1	5	0.5	35000	1
0.125	0.01	1	5	1	35000	1
0.125	0.01	1	10	0.1	35000	0.51
0.125	0.01	1	10	0.25	35000	1
0.125	0.01	1	10	0.5	35000	1
0.125	0.01	1	10	1	35000	1
0.125	0.01	1	20	0.1	35000	0.96
0.125	0.01	1	20	0.25	35000	1
0.125	0.01	1	20	0.5	35000	1
0.125	0.01	1	20	1	35000	1
0.15	0.01	0.5	1	0.1	35000	0.68
0.15	0.01	0.5	1	0.25	35000	0.68
0.15	0.01	0.5	1	0.5	35000	0.68
0.15	0.01	0.5	1	1	35000	0.68
0.15	0.01	0.5	5	0.1	35000	0.32
0.15	0.01	0.5	5	0.25	35000	0.93
0.15	0.01	0.5	5	0.5	35000	1
0.15	0.01	0.5	5	1	35000	1
0.15	0.01	0.5	10	0.1	35000	0.13
0.15	0.01	0.5	10	0.25	35000	1
0.15	0.01	0.5	10	0.5	35000	1
0.15	0.01	0.5	10	1	35000	1
0.15	0.01	0.5	20	0.1	35000	0.6
0.15	0.01	0.5	20	0.25	35000	1
0.15	0.01	0.5	20	0.5	35000	1
0.15	0.01	0.5	20	1	35000	1
0.15	0.01	0.75	1	0.1	35000	1
0.15	0.01	0.75	1	0.25	35000	1
0.15	0.01	0.75	1	0.5	35000	1
0.15	0.01	0.75	1	1	35000	1
0.15	0.01	0.75	5	0.1	35000	0.69
0.15	0.01	0.75	5	0.25	35000	1
0.15	0.01	0.75	5	0.5	35000	1
0.15	0.01	0.75	5	1	35000	1
0.15	0.01	0.75	10	0.1	35000	0.56
0.15	0.01	0.75	10	0.25	35000	1
0.15	0.01	0.75	10	0.5	35000	1
0.15	0.01	0.75	10	1	35000	1
0.15	0.01	0.75	20	0.1	35000	0.98
0.15	0.01	0.75	20	0.25	35000	1
0.15	0.01	0.75	20	0.5	35000	1
0.15	0.01	0.75	20	1	35000	1
0.15	0.01	1	1	0.1	35000	1
0.15	0.01	1	1	0.25	35000	1
0.15	0.01	1	1	0.5	35000	1
0.15	0.01	1	1	1	35000	1
0.15	0.01	1	5	0.1	35000	0.98
0.15	0.01	1	5	0.25	35000	1
0.15	0.01	1	5	0.5	35000	1
0.15	0.01	1	5	1	35000	1
0.15	0.01	1	10	0.1	35000	0.93
0.15	0.01	1	10	0.25	35000	1
0.15	0.01	1	10	0.5	35000	1
0.15	0.01	1	10	1	35000	1
0.15	0.01	1	20	0.1	35000	0.99
0.15	0.01	1	20	0.25	35000	1
0.15	0.01	1	20	0.5	35000	1
0.15	0.01	1	20	1	35000	1
0.175	0.01	0.5	1	0.1	35000	0.94
0.175	0.01	0.5	1	0.25	35000	0.94
0.175	0.01	0.5	1	0.5	35000	0.94
0.175	0.01	0.5	1	1	35000	0.94
0.175	0.01	0.5	5	0.1	35000	0.58
0.175	0.01	0.5	5	0.25	35000	1
0.175	0.01	0.5	5	0.5	35000	1
0.175	0.01	0.5	5	1	35000	1
0.175	0.01	0.5	10	0.1	35000	0.33
0.175	0.01	0.5	10	0.25	35000	1
0.175	0.01	0.5	10	0.5	35000	1
0.175	0.01	0.5	10	1	35000	1
0.175	0.01	0.5	20	0.1	35000	0.89
0.175	0.01	0.5	20	0.25	35000	1
0.175	0.01	0.5	20	0.5	35000	1
0.175	0.01	0.5	20	1	35000	1
0.175	0.01	0.75	1	0.1	35000	1
0.175	0.01	0.75	1	0.25	35000	1
0.175	0.01	0.75	1	0.5	35000	1
0.175	0.01	0.75	1	1	35000	1
0.175	0.01	0.75	5	0.1	35000	0.97
0.175	0.01	0.75	5	0.25	35000	1
0.175	0.01	0.75	5	0.5	35000	1
0.175	0.01	0.75	5	1	35000	1
0.175	0.01	0.75	10	0.1	35000	0.89
0.175	0.01	0.75	10	0.25	35000	1
0.175	0.01	0.75	10	0.5	35000	1
0.175	0.01	0.75	10	1	35000	1
0.175	0.01	0.75	20	0.1	35000	1
0.175	0.01	0.75	20	0.25	35000	1
0.175	0.01	0.75	20	0.5	35000	1
0.175	0.01	0.75	20	1	35000	1
0.175	0.01	1	1	0.1	35000	1
0.175	0.01	1	1	0.25	35000	1
0.175	0.01	1	1	0.5	35000	1
0.175	0.01	1	1	1	35000	1
0.175	0.01	1	5	0.1	35000	1
0.175	0.01	1	5	0.25	35000	1
0.175	0.01	1	5	0.5	35000	1
0.175	0.01	1	5	1	35000	1
0.175	0.01	1	10	0.1	35000	1
0.175	0.01	1	10	0.25	35000	1
0.175	0.01	1	10	0.5	35000	1
0.175	0.01	1	10	1	35000	1
0.175	0.01	1	20	0.1	35000	1
0.175	0.01	1	20	0.25	35000	1
0.175	0.01	1	20	0.5	35000	1
0.175	0.01	1	20	1	35000	1
0.2	0.01	0.5	1	0.1	35000	1
0.2	0.01	0.5	1	0.25	35000	1
0.2	0.01	0.5	1	0.5	35000	1
0.2	0.01	0.5	1	1	35000	1
0.2	0.01	0.5	5	0.1	35000	0.81
0.2	0.01	0.5	5	0.25	35000	1
0.2	0.01	0.5	5	0.5	35000	1
0.2	0.01	0.5	5	1	35000	1
0.2	0.01	0.5	10	0.1	35000	0.69
0.2	0.01	0.5	10	0.25	35000	1
0.2	0.01	0.5	10	0.5	35000	1
0.2	0.01	0.5	10	1	35000	1
0.2	0.01	0.5	20	0.1	35000	0.98
0.2	0.01	0.5	20	0.25	35000	1
0.2	0.01	0.5	20	0.5	35000	1
0.2	0.01	0.5	20	1	35000	1
0.2	0.01	0.75	1	0.1	35000	1
0.2	0.01	0.75	1	0.25	35000	1
0.2	0.01	0.75	1	0.5	35000	1
0.2	0.01	0.75	1	1	35000	1
0.2	0.01	0.75	5	0.1	35000	0.99
0.2	0.01	0.75	5	0.25	35000	1
0.2	0.01	0.75	5	0.5	35000	1
0.2	0.01	0.75	5	1	35000	1
0.2	0.01	0.75	10	0.1	35000	0.97
0.2	0.01	0.75	10	0.25	35000	1
0.2	0.01	0.75	10	0.5	35000	1
0.2	0.01	0.75	10	1	35000	1
0.2	0.01	0.75	20	0.1	35000	1
0.2	0.01	0.75	20	0.25	35000	1
0.2	0.01	0.75	20	0.5	35000	1
0.2	0.01	0.75	20	1	35000	1
0.2	0.01	1	1	0.1	35000	1
0.2	0.01	1	1	0.25	35000	1
0.2	0.01	1	1	0.5	35000	1
0.2	0.01	1	1	1	35000	1
0.2	0.01	1	5	0.1	35000	1
0.2	0.01	1	5	0.25	35000	1
0.2	0.01	1	5	0.5	35000	1
0.2	0.01	1	5	1	35000	1
0.2	0.01	1	10	0.1	35000	1
0.2	0.01	1	10	0.25	35000	1
0.2	0.01	1	10	0.5	35000	1
0.2	0.01	1	10	1	35000	1
0.2	0.01	1	20	0.1	35000	1
0.2	0.01	1	20	0.25	35000	1
0.2	0.01	1	20	0.5	35000	1
0.2	0.01	1	20	1	35000	1
